# Supplementary material for: A weighted sampling algorithm for the design of RNA sequences with targeted secondary structure and nucleotide distribution
Source: PubMed Central journal article supplement — Bioinformatics. 2013 Jun 19;29(13):i308–15. doi: 10.1093/bioinformatics/btt217 (PMC3694657; doi:10.1093/bioinformatics/btt217), 2013-06-19
Supplement: supp_btt217_main_ISMB_supp_mat.pdf [file supp_btt217_main_ISMB_supp_mat.pdf]

---

## 1 SUPPLEMENTARY DATA

### 1.1 Benchmark other softwares

To evaluate the performances of *IncaRNation*, we benchmark a set of classical softwares lacking GC-content control. Those are *RNAinverse*, *INFO-RNA*, *NUPACK:Design* and *Ernakenstein*. We present in Fig. 1 the average sequence identity and frequency for the sequences that generated them.

### 1.2 Benchmark *IncaRNation* + *RNAinverse*

To emphasize the usefulness of processing *IncaRNation* sequences with *RNAinverse*, we present the number of structures for which at least one sequence was generated with the desired MFE in Figure. 2

### 1.3 Limited impact on GC of local-search postprocessing of *IncaRNation* output

Since local search approaches tend to experience a bias towards GC-rich regions, it could be expected that our global approach, by postprocessing unpaired regions using a local search algorithm, would suffer from such a drift. However, as summarized in Table 1, we observed that the local search heuristic used to design nucleotides in loop regions has a very limited impact on the GC-content. For

each class of GC-content, we reported the observed GC-content in the sequence initially generated by *IncaRNation*, and the observed GC-content after the *RNAinverse* postprocessing (as defined in Section 2.3). Our results show that the GC-content is relatively well conserved (less than 6% variation), with a general tendency of the postprocessing step to bring the GC-content back to 50%.

| Target GC-content (%) | GC-content (%) of designed sequences |                                                 |
|-----------------------|--------------------------------------|-------------------------------------------------|
|                       | <i>IncaRNation</i> (Global)          | <i>IncaRNation</i> + <i>RNAinverse</i> (Glocal) |
| 10%                   | 15%                                  | 21% ↗ 6%                                        |
| 30%                   | 30%                                  | 33% ↗ 3%                                        |
| 50%                   | 48%                                  | 49% ↗ 1%                                        |
| 70%                   | 71%                                  | 69% ↘ 2%                                        |
| 90%                   | 83%                                  | 78% ↘ 5%                                        |

**Table 1.** Observed GC-content of solutions returned by *IncaRNation* (2nd column) and after the application of the local search postprocessing (3rd column).

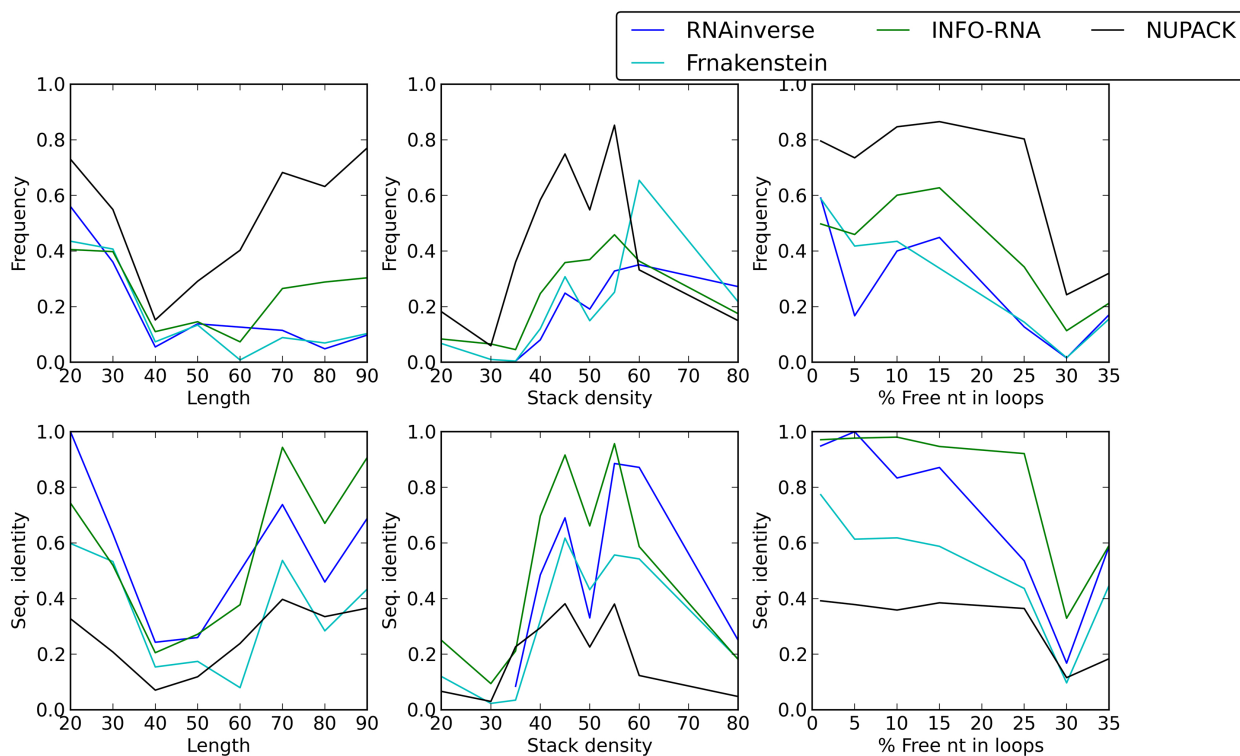

Fig. 1: The average sequence identity and frequency for softwares without GC-content control.

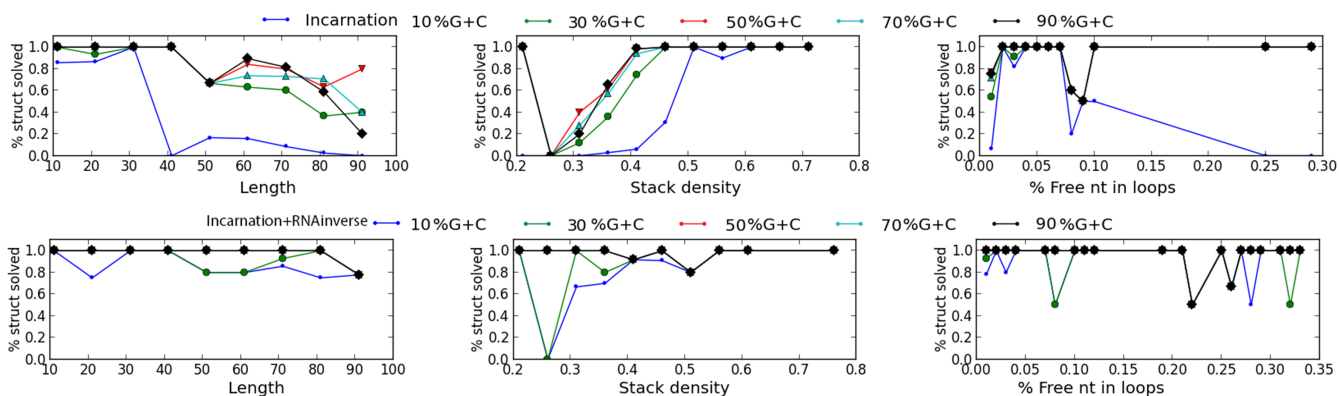

Fig. 2: The first row shows the number of structures for which one generated sequence has the structure as MFE when only using Incarnation. The second row shows when we process Incarnation results with RNAinverse.
